# Supplementary material for: Machine learning-guided co-optimization of fitness and diversity facilitates combinatorial library design in enzyme engineering
Source: PubMed Central journal article supplement (PMC11289365; doi:10.1038/s41467-024-50698-y), 2024-07-29
Supplement: 41467_2024_50698_MOESM3_ESM.pdf [file 41467_2024_50698_MOESM3_ESM.pdf]

## **Description of Additional Supplementary Files**

File Name: Supplementary Data 1

Description: Oligo pool sequences of 1,000 *Rma* cytochrome *c* variants from the MODIFY-informed library.
